# Supplementary material for: Non-Enzymatic Phenylboronic Acid-Based Optode Membrane for Glucose Monitoring in Serums of Diabetic Patients and in the Culture Medium of Human Embryos
Source: Sensors (Basel). 2022 Sep 21;22(19):7135. doi: 10.3390/s22197135 (PMC9571803; doi:10.3390/s22197135)
Supplement: Supplementary file 1 [file sensors-22-07135-s001.zip › sensors-1880509-supplementary.pdf]

## Article

# Non-enzymatic Phenylboronic Acid-based Optode Membrane for Glucose Monitoring in Serums of Diabetic Patients and in the Culture Medium of Human Embryos

Mohamed M. Taha <sup>1,2</sup>, Mahmoud S. Rizk <sup>1</sup>, Mohamed A. Zayed <sup>1</sup>, Fatehy M. Abdel-Haleem <sup>1,3</sup> and Ahmed Barhoum <sup>4,5,\*</sup>

<sup>1</sup> Chemistry Department, Faculty of Science, Cairo University, 12613 Giza, Egypt

<sup>2</sup> Adam International Hospital, Giza, Egypt

<sup>3</sup> Center for Hazards Mitigation, Environmental Studies and Research (CHMESR), Cairo University, Giza, Egypt

<sup>4</sup> NanoStruc Research Group, Chemistry Department, Faculty of Science, Helwan University, 11795 Cairo, Egypt

<sup>5</sup> National Centre for Sensor Research, Chemistry Department, Dublin City University, Dublin, Ireland

\* Correspondence: ahmed.barhoum@dcu.ie

**Table S1.** The effect of interfering materials at  $10^{-1}$  glucose,  $10^{-1}$  glucose+ $10^{-2}$  interfering species.

| Sample Solution           | Absorbance (A) at $\lambda_{\max}$ = 530 nm | Change in Absorbance ( $\Delta A$ ) Compared to Absorbance of the Glucose (0.578 a.u.) |
|---------------------------|---------------------------------------------|----------------------------------------------------------------------------------------|
| Glucose                   | 0.578                                       | ---                                                                                    |
| Glucose + sodium pyruvate | 0.548                                       | −0.030                                                                                 |
| Glucose + arginine        | 0.624                                       | +0.046                                                                                 |
| Glucose + glutamic acid   | 0.574                                       | −0.004                                                                                 |
| Glucose + tryptophan      | 0.574                                       | −0.004                                                                                 |
| Glucose + leucine         | 0.597                                       | +0.019                                                                                 |
| Glucose + sodium lactate  | 0.609                                       | +0.031                                                                                 |
| Glucose + phenylalanine   | 0.599                                       | +0.021                                                                                 |

**Table S2.** The effect of different interfering ions at different concentrations.

| Sample Solution                                   | Absorbance (A) at $\lambda_{\max}$ = 530 nm | Change in Absorbance ( $\Delta A$ ) Compared to Absorbance of the Glucose (0.576 a.u.) |
|---------------------------------------------------|---------------------------------------------|----------------------------------------------------------------------------------------|
| $10^{-3}$ M glucose                               | 0.576                                       | ---                                                                                    |
| $10^{-3}$ M glucose + $10^{-4}$ M sodium pyruvate | 0.532                                       | −0.044                                                                                 |
| $10^{-2}$ M glucose                               | 0.578                                       | ---                                                                                    |
| $10^{-2}$ M glucose + $10^{-3}$ M sodium pyruvate | 0.574                                       | −0.004                                                                                 |
| $10^{-1}$ M glucose                               | 0.59                                        | ---                                                                                    |
| $10^{-1}$ M glucose + $10^{-2}$ M sodium pyruvate | 0.56                                        | −0.03                                                                                  |
| $10^{-3}$ M glucose                               | 0.955                                       | ---                                                                                    |
| $10^{-3}$ M glucose + $10^{-4}$ M arginine        | 0.996                                       | +0.041                                                                                 |
| $10^{-2}$ M glucose                               | 0.952                                       | ---                                                                                    |
| $10^{-2}$ M glucose + $10^{-3}$ M arginine        | 0.953                                       | +0.001                                                                                 |
| $10^{-1}$ M glucose                               | 0.974                                       | ---                                                                                    |
| $10^{-1}$ M glucose + $10^{-2}$ M arginine        | 1.02                                        | +0.046                                                                                 |

|                                                               |       |        |
|---------------------------------------------------------------|-------|--------|
| 10 <sup>-3</sup> M glucose                                    | 1.031 | ---    |
| 10 <sup>-3</sup> M glucose + 10 <sup>-4</sup> M glutamic acid | 0.952 | -0.079 |
| 10 <sup>-2</sup> M glucose                                    | 0.957 | ---    |
| 10 <sup>-2</sup> M glucose + 10 <sup>-3</sup> M glutamic acid | 0.962 | +0.005 |
| 10 <sup>-1</sup> M glucose                                    | 0.992 | ---    |
| 10 <sup>-1</sup> M glucose + 10 <sup>-2</sup> M glutamic acid | 0.988 | -0.004 |
| 10 <sup>-3</sup> M glucose                                    | 1.239 | ---    |
| 10 <sup>-3</sup> M glucose + 10 <sup>-4</sup> M glutamic acid | 1.245 | +0.006 |
| 10 <sup>-2</sup> M glucose                                    | 1.237 | ---    |
| 10 <sup>-2</sup> M glucose + 10 <sup>-3</sup> M glutamic acid | 1.235 | -0.002 |
| 10 <sup>-1</sup> M glucose                                    | 1.233 | ---    |
| 10 <sup>-1</sup> M glucose + 10 <sup>-2</sup> M glutamic acid | 1.229 | -0.004 |
| 10 <sup>-3</sup> M glucose                                    | 0.677 | ---    |
| 10 <sup>-3</sup> M glucose + 10 <sup>-4</sup> M leucine       | 0.753 | +0.076 |
| 10 <sup>-2</sup> M glucose                                    | 0.738 | ---    |
| 10 <sup>-2</sup> M glucose + 10 <sup>-3</sup> M leucine       | 0.812 | +0.074 |
| 10 <sup>-1</sup> M glucose                                    | 0.716 | ---    |
| 10 <sup>-1</sup> M glucose + 10 <sup>-2</sup> M leucine       | 0.735 | +0.019 |
| 10 <sup>-3</sup> M glucose                                    | 0.554 | ---    |
| 10 <sup>-3</sup> M glucose + 10 <sup>-4</sup> M lactate       | 0.601 | +0.047 |
| 10 <sup>-2</sup> M glucose                                    | 0.592 | ---    |
| 10 <sup>-2</sup> M glucose + 10 <sup>-3</sup> M lactate       | 0.63  | +0.038 |
| 10 <sup>-1</sup> M glucose                                    | 0.656 | ---    |
| 10 <sup>-1</sup> M glucose + 10 <sup>-2</sup> M lactate       | 0.687 | +0.031 |
| 10 <sup>-3</sup> M glucose                                    | 1.083 | ---    |
| 10 <sup>-3</sup> M glucose + 10 <sup>-4</sup> M phenylalanine | 1.095 | +0.012 |
| 10 <sup>-2</sup> M glucose                                    | 1.107 | ---    |
| 10 <sup>-2</sup> M glucose + 10 <sup>-3</sup> M phenylalanine | 1.142 | +0.035 |
| 10 <sup>-1</sup> M glucose                                    | 1.07  | ---    |
| 10 <sup>-1</sup> M glucose + 10 <sup>-2</sup> M phenylalanine | 1.091 | +0.021 |

MohammadMostafa-1-DMSO-H1

Archive directory: /export/home/vnmr1/vnmrsys/data  
Sample directory: D05mm\_test\_12Mar2014-21:34:40  
File: PROTON

Pulse Sequence: s2pul  
Solvent: DMSO  
Temp: 30.0 C / 303.1 K  
Mercury-3000B "NMR300"

Relax. delay 6.000 sec  
Pulse 45.0 degrees  
Acq. time 4.000 sec  
Width 6600.7 Hz  
14 repetitions  
OBSERVE H1, 300.0687870 MHz  
DATA PROCESSING  
Line broadening 0.1 Hz  
FT size 65536  
Total time 58 min, 55 sec  
Date: Oct 6 2021

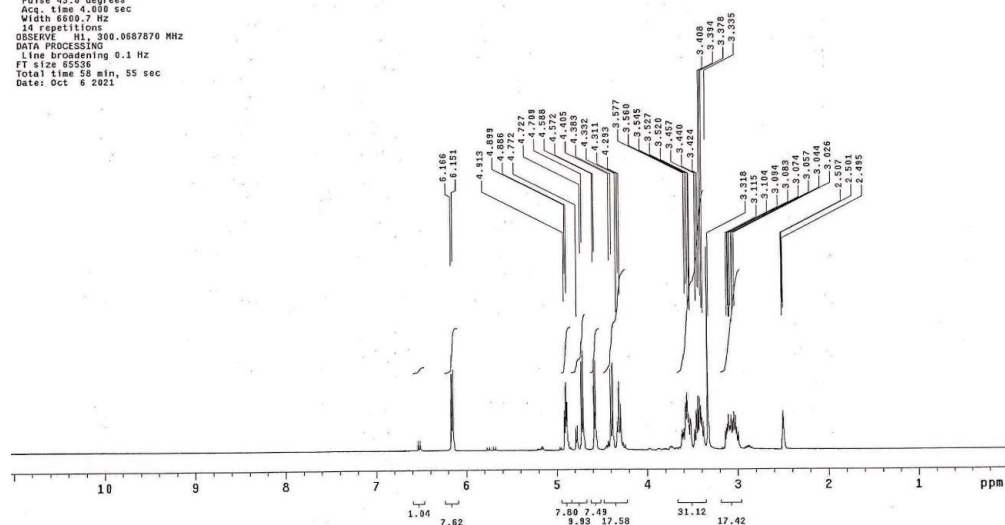

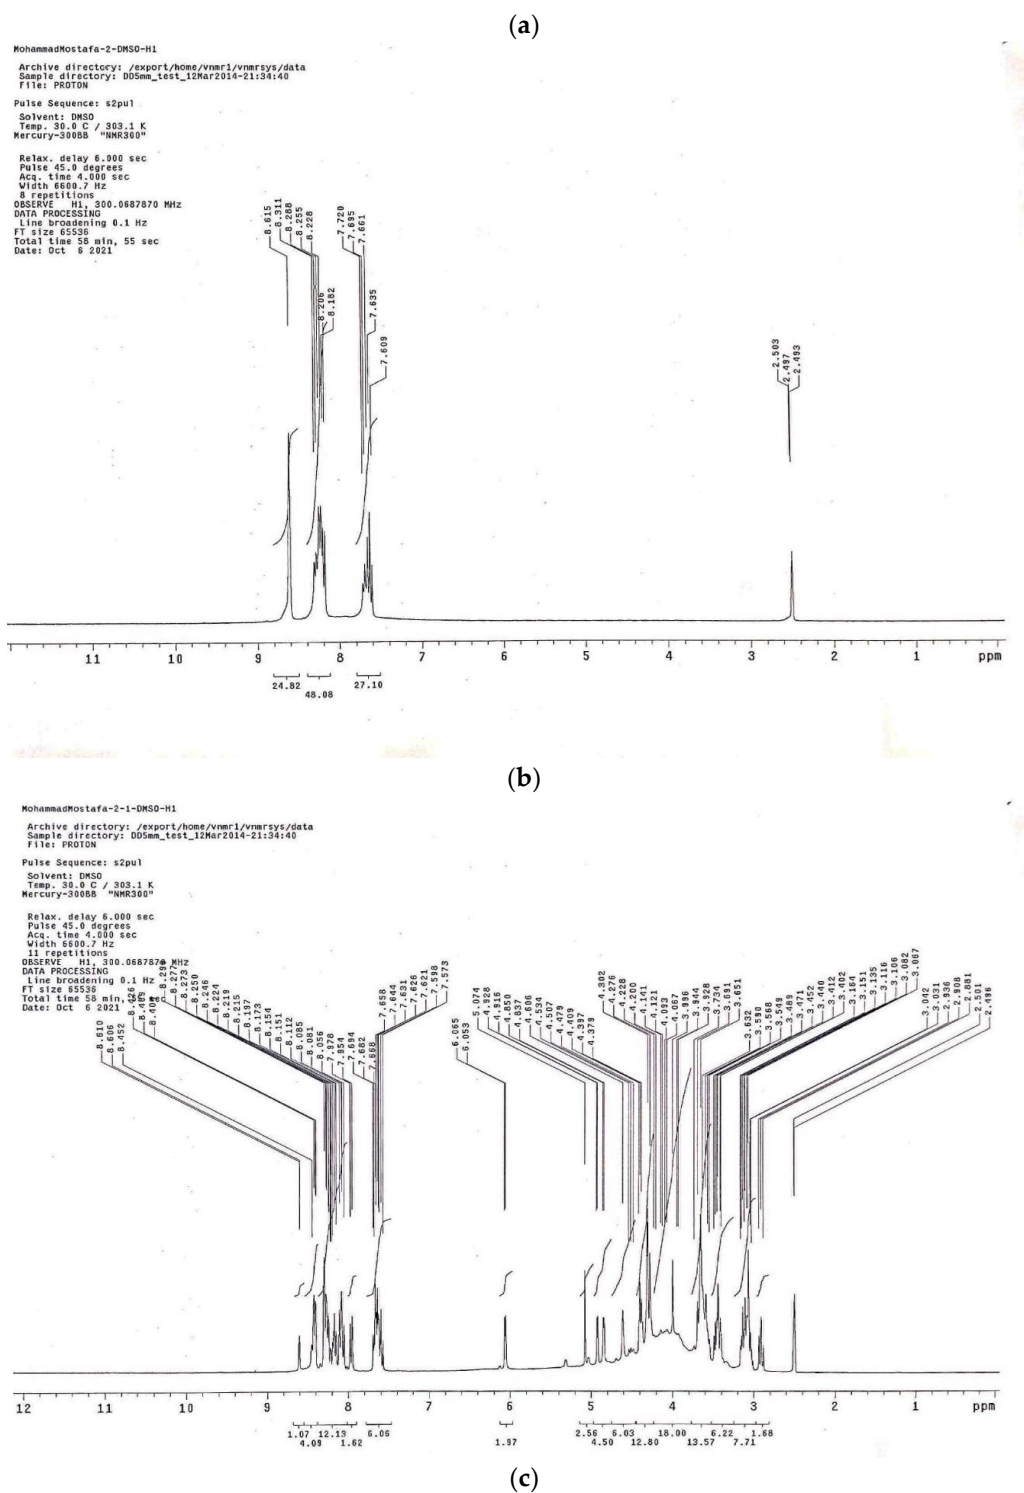

**Figure S1.**  $^1\text{H}$ -NMR spectra of (a) glucose, (b) ionophore-NPBA, and (c) their mixture (glucose-NPBA complex).
